# Supplementary material for: Evaluation of P5CS and ProDH activity in Paulownia tomentosa (Steud.) as an indicator of oxidative changes induced by drought stress
Source: PeerJ. 2024 Jan 25;12:e16697. doi: 10.7717/peerj.16697 (PMC10822135; doi:10.7717/peerj.16697)
Supplement: Supplemental Information 1 — The results of spectrophotometric measurements from the analyses. These results were used to compare the results of analyses between leaves and roots of seedlings subjected to various drought treatments. [file peerj-12-16697-s001.xlsx]

## Sheet: Arkusz1
Organ	Date	Moisture_%	Proline_µmol/g_FM	H2o2_µmol/g_FM	P5CS_U/mg_protein	ProDH_U/mg_protein
Leaves	1	100	5.74044	12.3486	0.00901872	0.222798
Leaves	1	100	4.90426	12.8139	0.00762809	0.238047
Leaves	1	100	5.57642	10.8567	0.00773333	0.22785
Leaves	1	100			0.00914607
Leaves	1	75	6.27298	14.6856	0.0107727	0.204545
Leaves	1	75	6.39596	14.0573	0.0107727	0.218545
Leaves	1	75	6.59068	14.019	0.00995715	0.209183
Leaves	1	75			0.00918238
Leaves	1	50	5.83347	15.5126	0.00830909	0.162325
Leaves	1	50	7.56757	15.3616	0.00962	0.183602
Leaves	1	50	7.16656	13.0988	0.00852199	0.161717
Leaves	1	50			0.00797626	0.153885
Leaves	1	25	8.46296	19.4806	0.0161362	0.102322
Leaves	1	25	7.08853	16.935	0.011186	0.124188
Leaves	1	25	6.05907	18.5677	0.0118105	0.120936
Leaves	1	25			0.0149866
Leaves	2	100	6.69402	15.1237	0.01518	0.211045
Leaves	2	100	5.09517	16.3818	0.0144	0.195666
Leaves	2	100	4.03265	17.0839	0.0166	0.208451
Leaves	2	100	5.84828		0.0143908
Leaves	2	75	8.32038	16.6655	0.01325	0.182972
Leaves	2	75	8.16897	15.5281	0.0132872	0.193113
Leaves	2	75	7.62467	18.1439	0.0129375	0.187794
Leaves	2	75	7.92958		0.0130237
Leaves	2	50	10.9285	17.073	0.0173813	0.186583
Leaves	2	50	8.12436	18.2937	0.0148256	0.198269
Leaves	2	50	7.32517	20.2501	0.0158667	0.173036
Leaves	2	50	8.9463		0.0160983
Leaves	2	25	7.64124	18.077	0.0180182	0.144947
Leaves	2	25	8.17884	16.7466	0.0163042	0.141479
Leaves	2	25	6.38021	19.6998	0.0160242	0.150374
Leaves	2	25	6.92898		0.0178735
Leaves	3	100	7.95137	15.6891	0.0168093	0.161887
Leaves	3	100	8.5937	17.4342	0.0171064	0.190153
Leaves	3	100	9.24882	16.3343	0.016381	0.20248
Leaves	3	100	7.97648			0.179731
Leaves	3	75	9.94754	18.3098	0.020275	0.113303
Leaves	3	75	7.95257	18.3339	0.0198333	0.106724
Leaves	3	75	8.56825	17.6341	0.0211333	0.120478
Leaves	3	75	8.10847			0.11037
Leaves	3	50	9.33612	21.2306	0.0239311	0.097835
Leaves	3	50	8.93097	21.7174	0.021448	0.0841511
Leaves	3	50	9.70129	19.5871	0.0219362	0.0980563
Leaves	3	50	8.72087			0.0848429
Leaves	3	25	10.9088	23.3715	0.04315	0.0780254
Leaves	3	25	10.5783	22.7011	0.0414286	0.0823308
Leaves	3	25	8.34319	22.8125	0.0476216	0.082717
Leaves	3	25	8.21248
Roots	1	100	1.29999	1.77885	0.0211088	0.0624766
Roots	1	100	1.84275	1.82837	0.0216486	0.0533508
Roots	1	100	1.36929	1.90347	0.0195857	0.0617746
Roots	1	100			0.0209188
Roots	1	75	1.32847	2.18172	0.0276552	0.0161456
Roots	1	75	1.01295	2.05295	0.0244545	0.015144
Roots	1	75	0.818191	2.02786	0.0287175	0.0163351
Roots	1	75			0.0279611
Roots	1	50	1.44538	2.34953	0.0392308	0.0284424
Roots	1	50	2.69376	2.37063	0.0210741	0.0252225
Roots	1	50	1.69707	2.78677	0.0238261	0.0262958
Roots	1	50			0.0299029	0.0262958
Roots	1	25	1.27192	3.05174	0.0428824	0.0227265
Roots	1	25	2.11099	3.20653	0.0558	0.0294412
Roots	1	25	1.91496	2.90935	0.0549091	0.020144
Roots	1	25			0.0499825
Roots	2	100	1.50554	1.26918	0.018	0.0608867
Roots	2	100	1.2771	0.995189	0.0192375	0.0641401
Roots	2	100	2.42843	1.03275	0.0171724	0.0617746
Roots	2	100	1.84876		0.0179865
Roots	2	75	1.43665	2.01608	0.024175	0.0411024
Roots	2	75	2.36159	1.78862	0.0262906	0.0473499
Roots	2	75	1.55324	1.72161	0.0282258	0.0460498
Roots	2	75	1.73797		0.0250837
Roots	2	50	2.58648	1.63566	0.0211071	0.0403828
Roots	2	50	1.80567	1.33462	0.0203235	0.0423519
Roots	2	50	1.47804	1.41299	0.0286786	0.0477966
Roots	2	50	2.18796		0.0237635
Roots	2	25	2.59891	2.86221	0.0278333	0.0374936
Roots	2	25	2.23012	1.73278	0.03125	0.0370421
Roots	2	25	1.93295	2.10375	0.0329843	0.0376932
Roots	2	25	2.01897		0.0283488
Roots	3	100	1.19064	2.87352	0.0198776	0.0661571
Roots	3	100	0.972386	2.71436	0.0190175	0.0792968
Roots	3	100	1.16629	1.47144	0.0209688	0.0749294
Roots	3	100	1.02938
Roots	3	75	1.17712	1.58331	0.0223529	0.0660591
Roots	3	75	1.32316	2.33391	0.0229828	0.0795559
Roots	3	75	1.54345	1.78198	0.0230244	0.0757646
Roots	3	75	1.29406
Roots	3	50	1.43473	1.74714	0.0353043	0.0555431
Roots	3	50	1.38655	1.28368	0.0358286	0.058408
Roots	3	50	1.54588	1.29345	0.03752	0.0692974
Roots	3	50	1.4241
Roots	3	25	1.20473	2.00822	0.0541	0.0522607
Roots	3	25	1.6721	1.89453	0.0455	0.044643
Roots	3	25	1.76752	2.19149	0.0463878	0.0552424
Roots	3	25	1.53018
